# Supplementary material for: Quantitative Assessment of Uncertainties and Sensitivities in the Estimation of Life Loss Due to the Instantaneous Break of a Hypothetical Dam in Switzerland
Source: MDPI journal article supplement (doi:10.3390/w13233414), 2021-12-02
Supplement: s1 [file s1]

Archive with 1 entries (1 files):
- water-1428943-supplementary.pdf
