# Supplementary material for: Quantitative Assessment of Uncertainties and Sensitivities in the Estimation of Life Loss Due to the Instantaneous Break of a Hypothetical Dam in Switzerland
Source: MDPI journal article supplement (doi:10.3390/w13233414), 2021-12-02
Supplement: s1 [file s1 › water-1428943-supplementary.pdf]

## Electronic Supplementary Material

**Table S1.** Data about land use, buildings and demographic characteristics collected for all major ( $\geq 1,000$  inhabitants) localities in the Rhone valley

| Inhabited locality | Demographics<br>(source: SFSO (2017a)) |                                   |                                    | Buildings | Land use<br>(source: SFSO (2018) and swisstopo (2019)) |                            |                              |
|--------------------|----------------------------------------|-----------------------------------|------------------------------------|-----------|--------------------------------------------------------|----------------------------|------------------------------|
|                    | Total population<br>[# people]         | Population $\geq 65$ years<br>[%] | Population density<br>[#people/m2] |           | Total area<br>[km2]                                    | Building density<br>[#/m2] | Residential buildings<br>[%] |
| Sion               | 33532                                  | 0.19                              | 4.10                               | 0.021     | 8.18                                                   | 0.38                       | 0.949                        |
| Martigny           | 17651                                  | 0.17                              | 3.19                               | 0.015     | 5.54                                                   | 0.26                       | 0.913                        |
| Monthey            | 17512                                  | 0.17                              | 2.93                               | 0.015     | 5.97                                                   | 0.30                       | 0.962                        |
| Sierre             | 16711                                  | 0.20                              | 3.33                               | 0.020     | 5.02                                                   | 0.38                       | 0.958                        |
| Brig-Glis          | 13088                                  | 0.19                              | 3.69                               | 0.018     | 3.55                                                   | 0.37                       | 0.929                        |
| Aigle              | 9942                                   | 0.17                              | 3.27                               | 0.015     | 3.04                                                   | 0.03                       | 0.940                        |
| Collombey-Muraz    | 8638                                   | 0.12                              | 2.04                               | 0.016     | 4.24                                                   | 0.24                       | 0.964                        |
| Fully              | 8524                                   | 0.15                              | 5.65                               | 0.023     | 1.51                                                   | 0.83                       | 0.906                        |
| Conthey            | 8485                                   | 0.18                              | 3.71                               | 0.020     | 2.29                                                   | 0.59                       | 0.963                        |
| Visp               | 7665                                   | 0.18                              | 2.13                               | 0.013     | 3.6                                                    | 0.19                       | 0.913                        |
| Saxon              | 5534                                   | 0.15                              | 2.43                               | 0.013     | 2.28                                                   | 0.43                       | 0.935                        |
| Saint-Maurice      | 4494                                   | 0.17                              | 2.58                               | 0.016     | 1.74                                                   | 0.39                       | 0.959                        |
| Vouvry             | 3968                                   | 0.16                              | 2.32                               | 0.013     | 1.71                                                   | 0.35                       | 0.926                        |
| Leuk               | 3915                                   | 0.19                              | 2.94                               | 0.017     | 1.33                                                   | 0.68                       | 0.970                        |
| Leytron            | 3084                                   | 0.24                              | 3.02                               | 0.019     | 1.02                                                   | 0.96                       | 0.977                        |
| Ardon              | 3050                                   | 0.15                              | 1.97                               | 0.017     | 1.55                                                   | 0.27                       | 0.944                        |
| Riddes             | 2985                                   | 0.18                              | 2.96                               | 0.017     | 1.01                                                   | 0.43                       | 0.948                        |
| Saillon            | 2482                                   | 0.18                              | 2.39                               | 0.006     | 1.04                                                   | 0.32                       | 0.939                        |
| Saint-Leonard      | 2269                                   | 0.17                              | 1.63                               | 0.018     | 1.39                                                   | 0.29                       | 0.960                        |
| Gampel-Bratsch     | 1909                                   | 0.21                              | 3.74                               | 0.024     | 0.51                                                   | 0.88                       | 0.973                        |
| Raron              | 1905                                   | 0.19                              | 1.95                               | 0.013     | 0.978                                                  | 0.33                       | 0.917                        |

|          |      |      |      |       |       |      |       |
|----------|------|------|------|-------|-------|------|-------|
| Vernayaz | 1886 | 0.17 | 2.37 | 0.020 | 0.796 | 0.37 | 0.942 |
| Charrat  | 1666 | 0.12 | 1.23 | 0.015 | 1.36  | 0.20 | 0.915 |
| Saas-Fee | 1621 | 0.14 | 4.05 | 0.023 | 0.4   | 1.03 | 0.976 |
| Salgesch | 1465 | 0.21 | 2.10 | 0.014 | 0.699 | 0.44 | 0.916 |
| Evionnaz | 1242 | 0.16 | 2.33 | 0.020 | 0.533 | 0.45 | 0.959 |

**Table S2.** Summary statistic for the characteristics of the inhabited localities in the Rhone valley

| a) Demographic                                                                    |                                                                                   |                                                                                   | b) Buildings                                                                       | c) Land use                                                                         |                                                                                     |                                                                                     |
|-----------------------------------------------------------------------------------|-----------------------------------------------------------------------------------|-----------------------------------------------------------------------------------|------------------------------------------------------------------------------------|-------------------------------------------------------------------------------------|-------------------------------------------------------------------------------------|-------------------------------------------------------------------------------------|
| 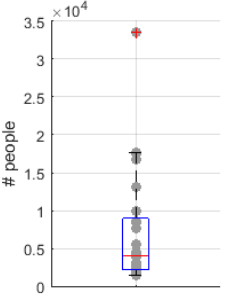 | 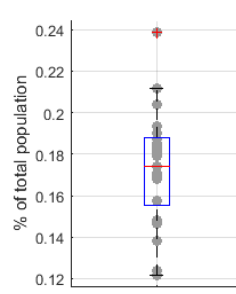 | 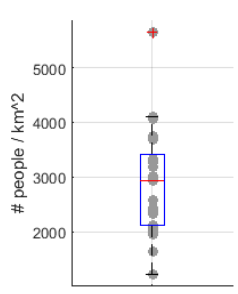 | 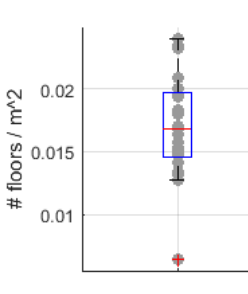 | 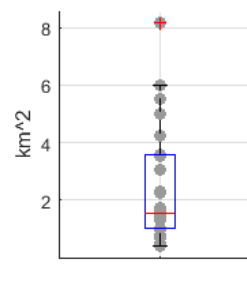 | 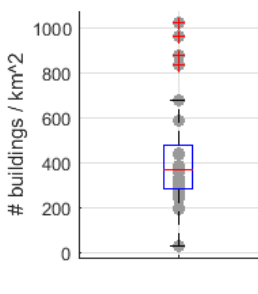 | 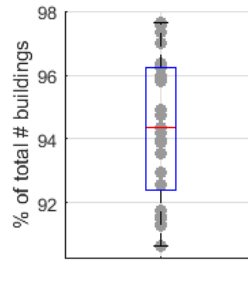 |
| Total population                                                                  | Population ≥ 65 years                                                             | Population density                                                                | Average height/building area                                                       | Total Area                                                                          | Building density                                                                    | Residential buildings                                                               |

● inhabited localities in the Rhone valley, CH

**Table S3.** Assumptions made for the structural inventory in the loss of shelter module and for the warning and evacuation module in HEC-LIFESim to build the LL-model representation for a Swiss case scenario

**a) Assumptions for the structural inventory in the loss of shelter module:**

The following table explains how the information on the building category, occupancy type, structural stability criteria, and number of stories in the GWR database has been adopted to the format of the HEC-LIFESim software.

| Information in the GWR database                |                                                    | Information in the HEC-LIFESim software    |                                                                      |
|------------------------------------------------|----------------------------------------------------|--------------------------------------------|----------------------------------------------------------------------|
| Building Category                              |                                                    |                                            |                                                                      |
| Commercial                                     |                                                    | COM                                        |                                                                      |
| Educational                                    |                                                    | EDU                                        |                                                                      |
| Governmental                                   |                                                    | GOV                                        |                                                                      |
| Industrial                                     |                                                    | IND                                        |                                                                      |
| Religious                                      |                                                    | REL                                        |                                                                      |
| Residential                                    |                                                    | RES                                        |                                                                      |
| Other (other buildings with/without apartment) |                                                    | COM                                        |                                                                      |
| Occupancy Type                                 |                                                    |                                            |                                                                      |
| 1110 -                                         | Buildings with one apartment                       | RES1-1SWB, RES1-2SWB, RES1-3SWB, RES1-SLWB | Single family residential house (1-3 stories, with/without basement) |
| 1121 -                                         | Buildings with two apartments                      | RES3A                                      | Multi Family Residence - Duplex                                      |
| 1122 -                                         | Buildings with three or more apartments            | RES3B, RES3C, RES3D, S3E, RES3F            | Multi Family Residence - 3 to more than 50 units                     |
| 1130 -                                         | Residential buildings for communities/associations | RES5, RES6                                 | Institutional dormitories, Nursing Homes                             |
| 1211 -                                         | Hotels and similar buildings                       | RES4                                       | Temporary lodging                                                    |
| 1212 -                                         | Other buildings for short accommodation            | RES4                                       | Temporary lodging                                                    |
| 1220 -                                         | Office buildings                                   | COM5, GOV1, GOV2                           | Banks, Government -l services & emergency response                   |
| 1230 -                                         | Wholesale and retail buildings                     | COM1, COM2, COM3                           | Retail trade, Wholesale trade, Personal and repair services          |
| 1241 -                                         | Train stations, terminal buildings                 | COM4                                       | Professional and technical services                                  |

|                                             |                                                  |                                             |                                           |
|---------------------------------------------|--------------------------------------------------|---------------------------------------------|-------------------------------------------|
| 1242 -                                      | Garage                                           | COM10                                       | Parking garages                           |
| 1251 -                                      | Industrial buildings                             | IND2, IND3                                  | Light industrial,<br>Food/drugs/chemicals |
| 1252 -                                      | Tanks, warehouses, silos                         | IND2, IND3                                  | Light industrial,<br>Food/drugs/chemicals |
| 1261 -                                      | Buildings for cultural and recreational purposes | COM8, COM9                                  | Entertainment and recreation, theaters    |
| 1262 -                                      | Museums and libraries                            | COM8                                        | Entertainment and recreation              |
| 1263 -                                      | Schools, Colleges, and Research facilities       | EDU1, EDU2                                  | Schools, colleges and universities        |
| 1264 -                                      | Hospitals and specialized health care facilities | COM7, COM6                                  | Medical office, clinic, hospitals         |
| 1265 -                                      | Sport halls                                      | COM8                                        | Entertainment and recreation              |
| 1271 -                                      | Agricultural commercial buildings                | AGR1                                        | Agriculture facilities and offices        |
| 1272 -                                      | Church and other cult buildings                  | REL1                                        | Churches and non-profit organizations     |
| 1273 -                                      | Monuments or Monument conservations              | COM8                                        | Entertainment and recreation              |
| 1274 -                                      | Other buildings                                  | COM3                                        | Personal and repair services              |
| Structural stability criteria               |                                                  |                                             |                                           |
|                                             |                                                  | IND3 treated as IND2                        |                                           |
|                                             |                                                  | COM1 and COM2 treated as COM3               |                                           |
|                                             |                                                  | EDU2 treated as EDU1                        |                                           |
|                                             |                                                  | GOV1 and GOV2 treated as COM5               |                                           |
|                                             |                                                  | RES3C, RES3D, RES3E, RES3F treated as RES3B |                                           |
|                                             |                                                  | RES1-2SWB;-3SWB; -SLWB treated as RES1-1SWB |                                           |
|                                             |                                                  | RES6 treated as RES5                        |                                           |
| Number of stories                           |                                                  |                                             |                                           |
| The number provided in the GWR database     |                                                  | The number provided in the GWR database     |                                           |
| No information provided in the GWR database |                                                  | 1                                           |                                           |

Furthermore, for the building type in the loss of shelter module, a separate table is given. This table gives the shares of the buildings with a specific material in each building category. The table is not based on the GWR database, but it is built on expert knowledge.

|                   | Building Type |          |       |              |         |
|-------------------|---------------|----------|-------|--------------|---------|
| Building Category | Wood          | Concrete | Steel | Manufactured | Masonry |

|             |    |    |    |   |    |
|-------------|----|----|----|---|----|
| Residential | 25 | 50 | 0  | 0 | 25 |
| Commercial  | 0  | 50 | 50 | 0 | 0  |
| Public      | 0  | 50 | 25 | 0 | 25 |
| Industrial  | 0  | 50 | 50 | 0 | 0  |

**b) Assumptions made for the warning and evacuation module:**

The following table contains the assumptions made for the demographic data. In other words, it explains how people are distributed in buildings with different occupancy types. The assumptions are made based on expert knowledge.

Furthermore, the assumptions are different depending on the time of the day. In particular, differentiation is made between night-time (2 a.m.) and daytime (2 p.m.).

| Night-time scenario (2 AM) |                                                                       |
|----------------------------|-----------------------------------------------------------------------|
| Occupancy type             | Information about people                                              |
| RES                        | all population except people located in hospitals                     |
| COM6 (hospital)            | 800 people, occupied 30%; 60% of those are people $\geq$ 65 years     |
| rest of COM                | no people                                                             |
| IND                        | no people                                                             |
| REL                        | no people                                                             |
| GOV                        | no people                                                             |
| EDU                        | no people                                                             |
| Day-time scenario (2 PM)   |                                                                       |
| IND (#4 buildings)         | 200, 100, 50, and 50 people                                           |
| REL                        | no people                                                             |
| GOV                        | no people                                                             |
| EDU                        | each – 200 people < 65 years                                          |
| COM5 (bank)                | no people                                                             |
| COM6 (hospital)            | 800 people, occupied 30%                                              |
| COM7 (# 2 clinic)          | each 60 people, occupied 40%; 50% of those are people $\geq$ 65 years |
| COM8 & COM 9               | no people                                                             |
| COM10 (garage)             | no people                                                             |
| RES                        | people < 65 years - 15% of the night capacity                         |
| RES                        | People $\geq$ 65 years - 35% of the night capacity                    |

**Table S4.** Different flood characteristics reflecting scenarios F05, F50, and F95

| Maximal water depth (m)                                                             | Maximal flow velocity (m/s)                                                          |
|-------------------------------------------------------------------------------------|--------------------------------------------------------------------------------------|
| Scenario F05 corresponding to the 5% flood severity                                 |                                                                                      |
| 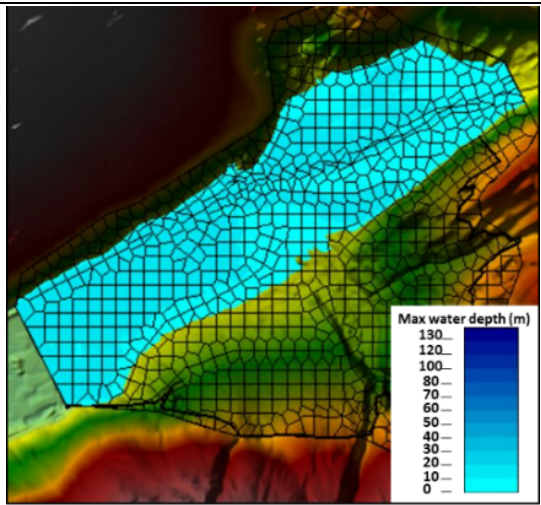   | 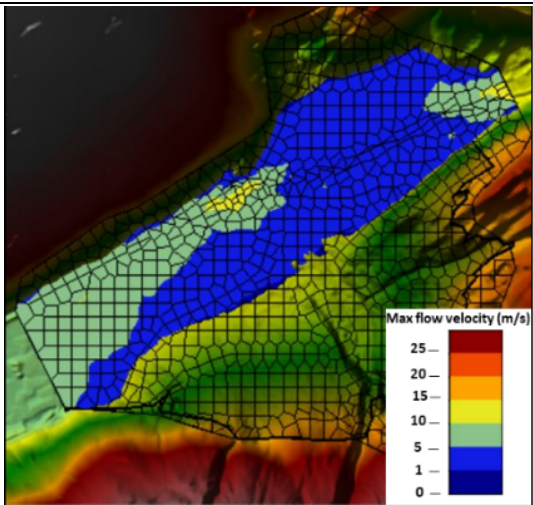   |
| Scenario F50 corresponding to the median flood severity                             |                                                                                      |
| 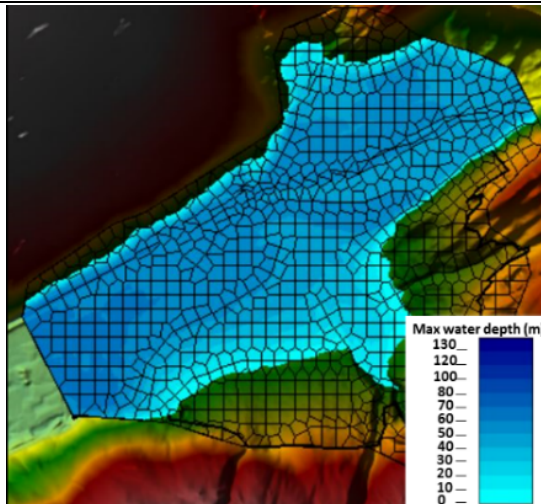  | 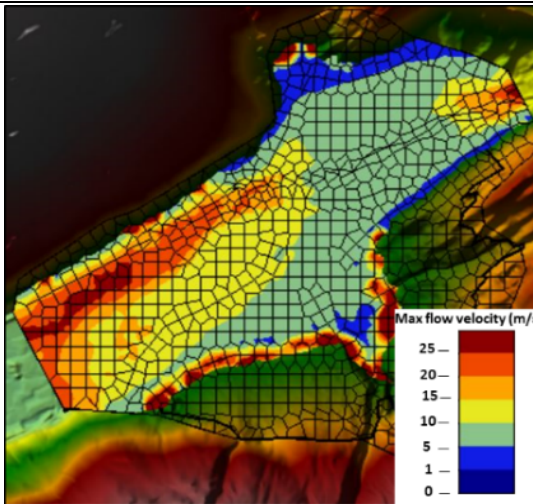  |
| Scenario F95 corresponding to the 95% flood severity                                |                                                                                      |
| 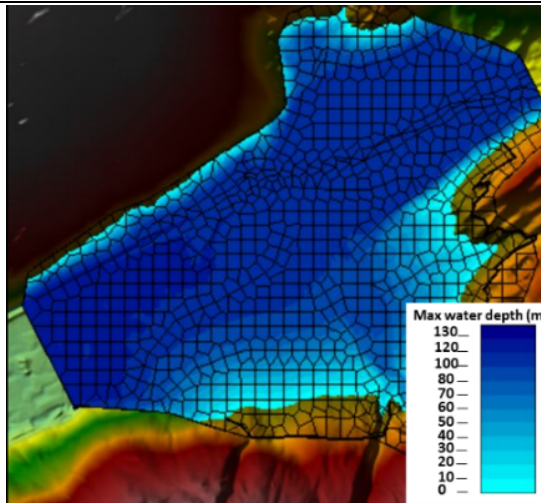 | 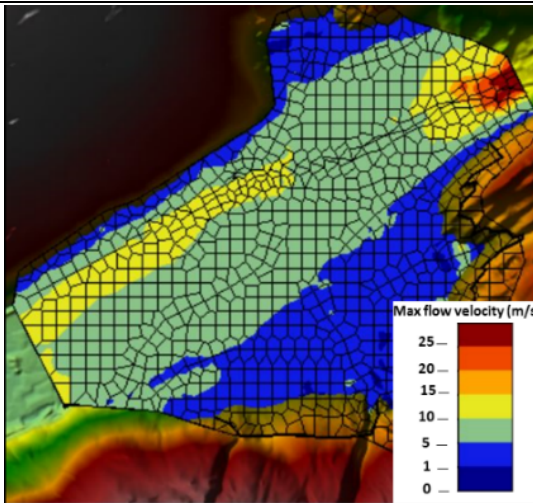 |

**Table S5.** Overview of the research conducted about LL-modeling: Discussions and results on methods for uncertainty and sensitivity analyses; also input parameters contributing most to uncertainty of the model output. Parameters considered for the uncertainty quantification in this study are given in bold

| Author(s)                                       | Year | Title                                                                           | Method for uncertainty analysis                                                                                                                                                                                                                                                                                                                                                                                                            | Method for sensitivity analysis                                                                                                     | Uncertain parameters                                                                                                                                              |
|-------------------------------------------------|------|---------------------------------------------------------------------------------|--------------------------------------------------------------------------------------------------------------------------------------------------------------------------------------------------------------------------------------------------------------------------------------------------------------------------------------------------------------------------------------------------------------------------------------------|-------------------------------------------------------------------------------------------------------------------------------------|-------------------------------------------------------------------------------------------------------------------------------------------------------------------|
| Graham, W.J.,                                   | 1999 | A Procedure for Estimating Loss of Life Caused by Dam Failure, DSO-99-06        | This procedure suggests various causes of dam failure will result in differences in PAR and the severity of the flooding. Another type of uncertainty is the time of day, time of week and time of year that failure occurs. Additional uncertainty is associated with when warnings would be initiated. The last type of uncertainty is associated with the fatality rate, with which it is suggested to use the range of fatality rates. |                                                                                                                                     | Cause of the failure, time of the failure, <b>warning time</b> , <b>fatality rate</b> , <b>PAR</b> , conditions at a time of the failure (reservoir level, rain)  |
| Aboelata, M., Bowles, D.S., & McClelland, D.M., | 2003 | A model for estimating dam failure life loss                                    | The uncertainty simulation procedure includes: Generation of sets of realizations of inputs using a Latin Hypercube sampling technique; model simulations for each set of realizations; Results analysis and presentation.                                                                                                                                                                                                                 | The different warning times were tested; it was concluded that decrease in warning time leads to increase in fatality rate.         | structure damage criteria, human & vehicle stability criteria, <b>warning initiation time</b> , <b>warning diffusion</b> , mobilization, <b>fatality rate</b>     |
| Lee, J.S.,                                      | 2003 | Uncertainties in the Predicted Number of Life Loss due to the Dam Breach Floods | The uncertainty analyses were conducted using the Monte Carlo simulation based on the Latin Hypercube Sampling technique. The following uncertainties were considered: uncertainty in the flood routing results and uncertainty in the fatality rates, i.e., in the warning time, necessary for determining the fatality rates.                                                                                                            | Different scenarios were done for different failure/no failure, distance from the dam site, daytime, day of the week, season.       | <b>maximum flood elevation</b> , time to maximum flood elevation, <b>maximum flow</b> , <b>fatality rates</b> , <b>warning time</b>                               |
| Bowles, D.S., & Aboelata, M.,                   | 2007 | Evacuation and LL estimation model for Natural & Dam break floods               | The Uncertainty Mode of HEC-LIFESim propagates uncertainties associated with model parameters and inputs through the model to provide probability distributions of LL-estimates.                                                                                                                                                                                                                                                           | Sensitivity is tested for different warning times (varied from T=3 hours to T=2 hours), evacuation destinations (#4) and increasing | <b>warning initiation time</b> , <b>warning diffusion curve</b> , mobilization time curve, modal split between pedestrians and vehicles, modal split between cars |

|                               |      |                                                                                             |                                                                                                                                                                                                                                                                                                                                                                                                                                                                                                                                                                                                                            |                                                                                                                                                                                                                           |                                                                                                                                                                                                                                    |
|-------------------------------|------|---------------------------------------------------------------------------------------------|----------------------------------------------------------------------------------------------------------------------------------------------------------------------------------------------------------------------------------------------------------------------------------------------------------------------------------------------------------------------------------------------------------------------------------------------------------------------------------------------------------------------------------------------------------------------------------------------------------------------------|---------------------------------------------------------------------------------------------------------------------------------------------------------------------------------------------------------------------------|------------------------------------------------------------------------------------------------------------------------------------------------------------------------------------------------------------------------------------|
|                               |      |                                                                                             |                                                                                                                                                                                                                                                                                                                                                                                                                                                                                                                                                                                                                            | population with the same capacity of the road network. Concluded the importance of the warning time, clear evacuation strategy; increase of population with the same road capacity resulted in increasing fatality rates. | and SUVs, vehicle-occupancy rate (people/vehicle), free flow speed (km/h), jam density (vehicles/km-lane), human and vehicle stability criteria, structural damage criteria, height of the first level of buildings, fatality rate |
| Jonkman, S.N.                 | 2007 | Loss of life estimation in flood risk management                                            | The focus is on river and coastal floods on low lying areas. The parameters considered is water depth, velocity, warning and evacuation. The capacity and strength of buildings is mentioned to be of high importance. It is mentioned that the application of the dose response function can influence uncertainty in consequences, i.e., the distribution of the number of fatalities (the standard deviation of the expected number of fatalities). It was shown that the distribution of consequences depends on the standard deviation of the loads and resistances and the dependence between loads and resistances. |                                                                                                                                                                                                                           | <b>water depth</b> , water velocity, <b>warning</b> and evacuation, capacity and strength of buildings                                                                                                                             |
| Aboelata, M., & Bowles, D.S., | 2008 | LIFESim: A tool for estimating and reducing life-loss resulting from Dam and Levee Failures | Uncertainty module existing in HEC-LIFESim is used to estimate the distribution of LL with consideration given to uncertainty in the following: evacuation rate; rescue efficiency in the safe zone; rescue efficiency in the compromised and chance zone; fatality rate in the safe, compromised, chance zones. The results are expressed for the particular drainage basin as probability distributions for the mean, for 5% and for 95% percentiles.                                                                                                                                                                    |                                                                                                                                                                                                                           | evacuation rate, rescue efficiency, <b>fatality rate</b>                                                                                                                                                                           |

|                                       |      |                                                                                                                                        |                                                                                                                                                                                                                                                                                                                                                                                                                                                                       |                                                                                                            |                                                                                                                                         |
|---------------------------------------|------|----------------------------------------------------------------------------------------------------------------------------------------|-----------------------------------------------------------------------------------------------------------------------------------------------------------------------------------------------------------------------------------------------------------------------------------------------------------------------------------------------------------------------------------------------------------------------------------------------------------------------|------------------------------------------------------------------------------------------------------------|-----------------------------------------------------------------------------------------------------------------------------------------|
| Jonkman, S.N., & Vrijling, J.K.,      | 2008 | Loss of life due to foods                                                                                                              | The work is focused on coastal floods. It mentions uncertainties in the mortality function since there is not enough empirical data available for calibration.                                                                                                                                                                                                                                                                                                        |                                                                                                            |                                                                                                                                         |
| Graham, W.J.,                         | 2009 | A comparison of methods for estimating loss of life from dam failure                                                                   | The paper contains an evaluation of many different methodologies for LL estimation. For LIFESim particularly, it is said that significant uncertainties are in 1. When warning is issued; 2. how quickly the warning is disseminated and how effective it is in getting people to take unction; 3. how many people do not evacuate; 4. the transportation mode and route used to leave the danger area.                                                               |                                                                                                            | <b>warning time, warning diffusion curve,</b><br>mobilization time curve, % of PAR that do not evacuate, transportation mode and routes |
| Davison, M., Lumbroso, D., & Tagg, A. | 2013 | The use of a Monte-Carlo analysis to assess the uncertainty in the estimates of loss of life from flooding using an agent-based model. | A Monte-Carlo uncertainty analysis was undertaken for two case study sites in England using the Life Safety Model (LSM) to assess the sources of uncertainty in loss of life estimates from floods. The research used a Monte-Carlo analysis to estimate the sensitivity of evacuation times and LL to the physical characteristics of people (e.g., height, weight); parameters that affects the strengths of buildings and the stability of vehicles in floodwater. |                                                                                                            | people's height and weight, parameters of the strengths of buildings, stability of vehicles                                             |
| U.S. Bureau of Reclamation            | 2014 | RCEM – Reclamation Consequence Estimating Methodology                                                                                  |                                                                                                                                                                                                                                                                                                                                                                                                                                                                       | Example variations in a sensitivity analysis include PAR, flood depth & velocity values, and warning times | <b>PAR, flood depth &amp; velocity, warning times</b>                                                                                   |
| McCann & Paxson                       | 2016 | Uncertainty in Dam Failure Consequence Estimates                                                                                       | For each scenario, 1,000 simulations were performed using the MCBreach model to estimate the aleatory uncertainty in the breach outflow hydrograph. Then, the cumulative pdf was built for the peak outflow and for the peak flood elevations. After, the fatality rate was                                                                                                                                                                                           | 18 scenarios for different dam breach widths, time to failure, methods for life loss                       | dam breach widths, time to failure                                                                                                      |

|                              |      |                                                                                                                                                                       |                                                                                                                                                                                                                                                                                                                                                                                                                                                         |                            |                                                                                                                                                                      |
|------------------------------|------|-----------------------------------------------------------------------------------------------------------------------------------------------------------------------|---------------------------------------------------------------------------------------------------------------------------------------------------------------------------------------------------------------------------------------------------------------------------------------------------------------------------------------------------------------------------------------------------------------------------------------------------------|----------------------------|----------------------------------------------------------------------------------------------------------------------------------------------------------------------|
|                              |      |                                                                                                                                                                       | calculated for the chosen three scenarios. In addition, the implementation of a Bayesian risk model demonstrated contribution of different sources of aleatory and epistemic uncertainty to the risk results.                                                                                                                                                                                                                                           | estimation were performed. |                                                                                                                                                                      |
| Wang, C., et al.             | 2017 | Life Loss Estimation Based on Dam-Break Flood Uncertainties and Lack of Information in Mountainous Regions of Western China.                                          | The systems as GIS and MIKE were used together with an improved support vector machine (SVM) to estimate life losses. Population at risk was given by overlapping the residential distribution and flooded layers. The results showed that warning time and an understanding by the population at risk the level of a dam-break disaster are the two main factors influencing LL.                                                                       |                            | <b>PAR, alarm time</b> , flood intensity, <b>proportion of young adults in PAR</b> , weather, occurrence time of the dam failure, distance for the dam site, storage |
| Lumbroso, D., & Davison, M., | 2018 | Use of an agent-based model and Monte Carlo analysis to estimate the effectiveness of emergency management interventions to reduce loss of life during extreme floods | The Life Safety Model (LSM) and a Monte Carlo analysis was used to assess the effectiveness of emergency management interventions in terms of loss of life, considering uncertainties in the physical characteristics of the population at risk, represented by people's height and mass. Development of probability distributions for highest safe depth, critical depth and velocity combination for toppling, and the same combination for drowning. |                            | people's height and mass                                                                                                                                             |

**Table S6.** The PCE-degree and values of  $\epsilon_{L00}$  and MSE errors (fraction) for different model outputs using different sizes of the experimental design

| Full Model<br>Evaluation [#] | F50                 |                  |        |                  |                  |        | F05                 |                  |        |                  |                  |        | F95                 |                  |        |                  |                  |        |
|------------------------------|---------------------|------------------|--------|------------------|------------------|--------|---------------------|------------------|--------|------------------|------------------|--------|---------------------|------------------|--------|------------------|------------------|--------|
|                              | Night-time [2 a.m.] |                  |        | Daytime [2 p.m.] |                  |        | Night-time [2 a.m.] |                  |        | Daytime [2 p.m.] |                  |        | Night-time [2 a.m.] |                  |        | Daytime [2 p.m.] |                  |        |
|                              | PCE                 | $\epsilon_{L00}$ | MSE    | PCE              | $\epsilon_{L00}$ | MSE    | PCE                 | $\epsilon_{L00}$ | MSE    | PCE              | $\epsilon_{L00}$ | MSE    | PCE                 | $\epsilon_{L00}$ | MSE    | PCE              | $\epsilon_{L00}$ | MSE    |
| 50                           | 3                   | 0.0374           | 0.0678 | 2                | 0.0751           | 0.1028 | 3                   | 0.0336           | 0.0446 | 3                | 0.0916           | 0.1567 | 4                   | 0.0041           | 0.4253 | 8                | 0.0176           | 0.2808 |
| 100                          | 2                   | 0.0694           | 0.1207 | 2                | 0.0789           | 0.1146 | 6                   | 0.0135           | 0.0338 | 2                | 0.0819           | 0.1246 | 2                   | 0.0710           | 0.1139 | 2                | 0.0678           | 0.0989 |
| 150                          | 9                   | 0.0021           | 0.0408 | 7                | 0.0038           | 0.0406 | 8                   | 0.0042           | 0.0176 | 9                | 0.0050           | 0.0523 | 8                   | 0.0038           | 0.0264 | 3                | 0.0226           | 0.1330 |
| 200                          | 5                   | 0.0062           | 0.0064 | 5                | 0.0092           | 0.0063 | 5                   | 0.0060           | 0.0074 | 5                | 0.0080           | 0.0705 | 5                   | 0.0066           | 0.0038 | 5                | 0.0062           | 0.0072 |
| 250                          | 7                   | 0.0019           | 0.0016 | 9                | 0.0021           | 0.0020 | 7                   | 0.0039           | 0.0039 | 7                | 0.0041           | 0.0038 | 7                   | 0.0036           | 0.0026 | 9                | 0.0020           | 0.0014 |
| 300                          | 7                   | 0.0018           | 0.0015 | 9                | 0.0018           | 0.0015 | 10                  | 0.0024           | 0.0032 | 6                | 0.0042           | 0.0130 | 7                   | 0.0035           | 0.0016 | 8                | 0.0020           | 0.0019 |
| 350                          | 7                   | 0.0014           | 0.0012 | 9                | 0.0019           | 0.0070 | 8                   | 0.0031           | 0.0016 | 7                | 0.0035           | 0.0029 |                     |                  |        |                  |                  |        |
| 400                          | 7                   | 0.0016           | 0.0008 | 13               | 0.0014           | 0.0015 | 8                   | 0.0026           | 0.0013 | 8                | 0.0032           | 0.0018 |                     |                  |        |                  |                  |        |
| 450                          | 7                   | 0.0013           | 0.0017 | 8                | 0.0017           | 0.0022 | 8                   | 0.0022           | 0.0023 | 9                | 0.0029           | 0.0041 |                     |                  |        |                  |                  |        |
| 500                          | 7                   | 0.0014           | 0.0021 | 9                | 0.0016           | 0.0017 | 8                   | 0.0023           | 0.0013 | 9                | 0.0028           | 0.0031 |                     |                  |        |                  |                  |        |
| 550                          | 7                   | 0.0013           | 0.0013 | 15               | 0.0015           | 0.0016 | 8                   | 0.0023           | 0.0014 | 12               | 0.0027           | 0.0027 |                     |                  |        |                  |                  |        |
| Threshold of 5 fatalities    |                     | 0.0019           |        |                  | 0.0019           |        |                     | 0.0040           |        |                  | 0.0034           |        |                     | 0.0019           |        |                  | 0.0020           |        |

**Table S7.** Comparison of the LL estimates, including their uncertainty, for the three scenarios F05, F50 and F95 and the two timing 2 a.m. and 2 p.m. considered in this study calculated with the PCE and different MC samples (100, 1,000, 10,000, 100,000) implemented in HEC-LIFESim

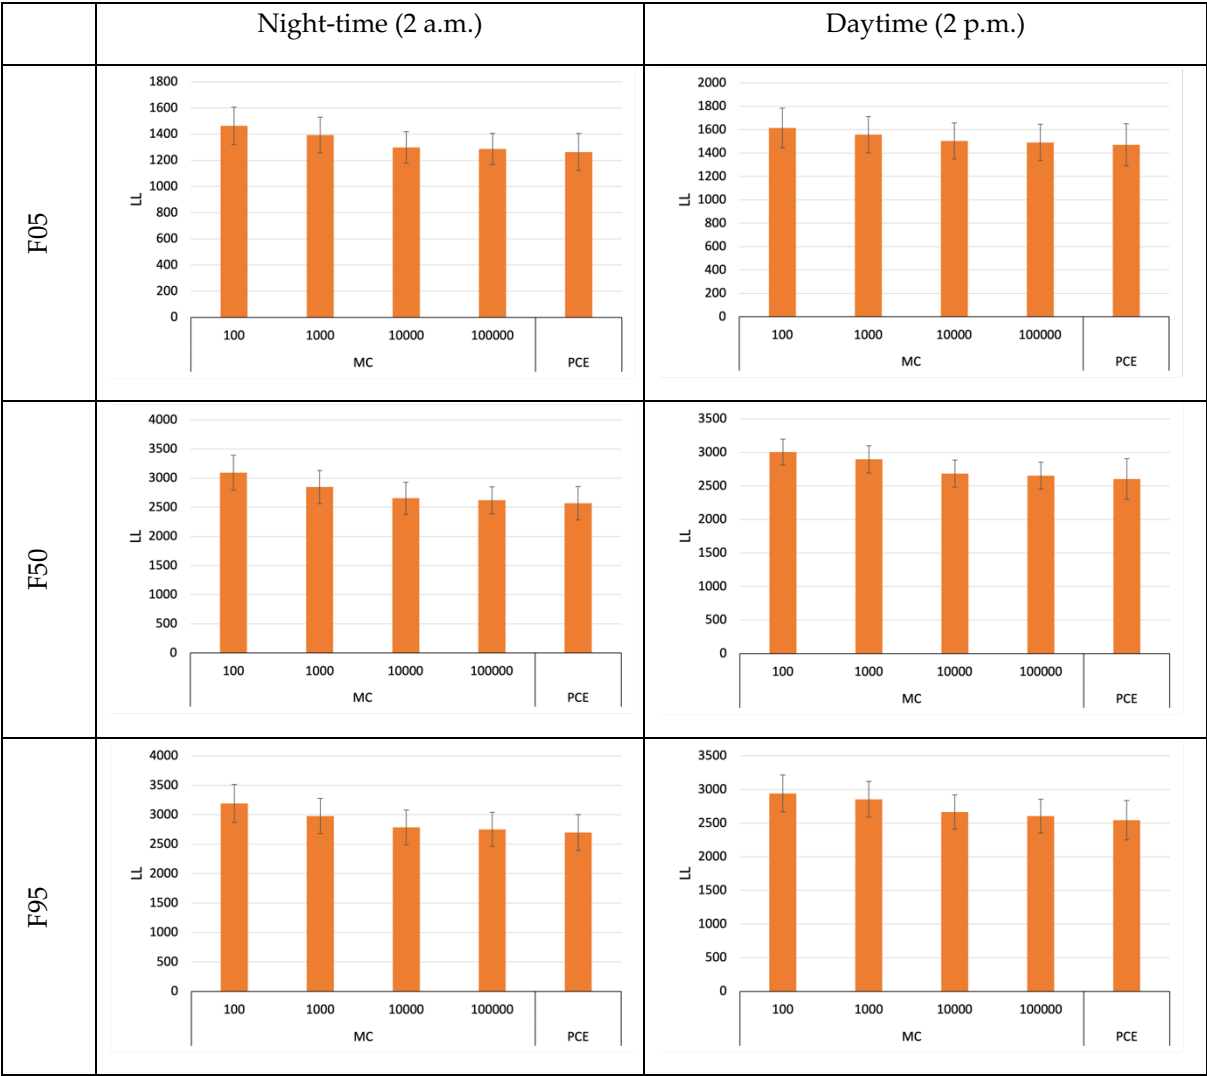

**Table S8.** The values of the 1<sup>st</sup> and total Sobol' indices and Borgonovo indices calculated for different model outputs in all six defined scenarios

| Model Input Parameter | F50                         |             |           |                             |             |           | F05                         |             |           |                             |             |           | F95                         |             |           |                             |             |           |
|-----------------------|-----------------------------|-------------|-----------|-----------------------------|-------------|-----------|-----------------------------|-------------|-----------|-----------------------------|-------------|-----------|-----------------------------|-------------|-----------|-----------------------------|-------------|-----------|
|                       | Night-time [2 a.m.]         |             |           | Daytime [2 p.m.]            |             |           | Night-time [2 a.m.]         |             |           | Daytime [2 p.m.]            |             |           | Night-time [2 a.m.]         |             |           | Daytime [2 p.m.]            |             |           |
|                       | 1 <sup>st</sup> Order Sobol | Total Sobol | Borgonovo | 1 <sup>st</sup> Order Sobol | Total Sobol | Borgonovo | 1 <sup>st</sup> Order Sobol | Total Sobol | Borgonovo | 1 <sup>st</sup> Order Sobol | Total Sobol | Borgonovo | 1 <sup>st</sup> Order Sobol | Total Sobol | Borgonovo | 1 <sup>st</sup> Order Sobol | Total Sobol | Borgonovo |
| Receptor              |                             |             |           |                             |             |           |                             |             |           |                             |             |           |                             |             |           |                             |             |           |
| $P_{tot}$             | 8.29E-1                     | 8.29E-1     | 5.26E-1   | 8.28E-1                     | 8.28E-1     | 5.24E-1   | 8.06E-1                     | 8.06E-1     | 4.97E-1   | 8.25E-1                     | 8.25E-1     | 5.23E-1   | 8.12E-1                     | 8.12E-1     | 4.98E-1   | 7.97E-1                     | 7.97E-1     | 4.80E-1   |
| $P_{o65}$             | 0                           | 8.47E-5     | 3.67E-2   | 0                           | 1.04E-4     | 4.13E-2   | 2.35E-5                     | 1.23E-4     | 3.86E-2   | 0                           | 7.49E-5     | 3.68E-2   | 0                           | 9.44E-5     | 3.80E-2   | 0                           | 1.25E-4     | 3.77E-2   |
| $H$                   | 0                           | 1.11E-5     | 4.14E-2   | 0                           | 6.71E-5     | 4.29E-2   | 9.72E-5                     | 1.12E-4     | 3.99E-2   | 2.00E-4                     | 3.04E-4     | 3.98E-2   | 0                           | 0           | 4.16E-2   | 0                           | 4.99E-5     | 4.27E-2   |
| Reaction              |                             |             |           |                             |             |           |                             |             |           |                             |             |           |                             |             |           |                             |             |           |
| $F_{chance}$          | 1.16E-1                     | 1.16E-1     | 1.29E-1   | 1.06E-1                     | 1.06E-1     | 1.23E-1   | 1.35E-1                     | 1.35E-1     | 1.43E-1   | 1.14E-1                     | 1.14E-1     | 1.26E-1   | 1.07E-1                     | 1.07E-1     | 1.23E-1   | 1.10E-1                     | 1.11E-1     | 1.26E-1   |
| $F_{compr}$           | 6.41E-6                     | 4.89E-5     | 3.61E-2   | 0                           | 5.53E-5     | 3.93E-2   | 0                           | 1.55E-4     | 3.69E-2   | 0                           | 5.97E-5     | 4.05E-2   | 3.15E-5                     | 7.18E-5     | 3.92E-2   | 0                           | 2.99E-5     | 4.12E-2   |
| $T_{wid}$             | 5.50E-2                     | 5.53E-2     | 8.68E-2   | 6.52E-2                     | 6.54E-2     | 9.61E-2   | 5.87E-2                     | 5.90E-2     | 9.24E-2   | 6.1E-2                      | 6.04E-2     | 9.50E-2   | 8.09E-2                     | 8.12E-2     | 1.14E-1   | 9.15E-2                     | 9.19E-2     | 1.21E-1   |
| $T_{hcd}$             | 1.31E-4                     | 3.77E-4     | 4.28E-2   | 1.33E-4                     | 4.13E-4     | 4.09E-2   | 1.78E-4                     | 3.93E-4     | 4.17E-2   | 1.79E-4                     | 3.83E-4     | 4.13E-2   | 6.62E-5                     | 3.10E-4     | 4.34E-2   | 2.02E-4                     | 4.94E-4     | 4.06E-2   |
